# Supplementary material for: CloVR-ITS: Automated internal transcribed spacer amplicon sequence analysis pipeline for the characterization of fungal microbiota
Source: PubMed Central journal article supplement (PMC3869194; doi:10.1186/2049-2618-1-6), 2013-02-04

**Figure S1. Overview of the ITS region and primers used in this study.**

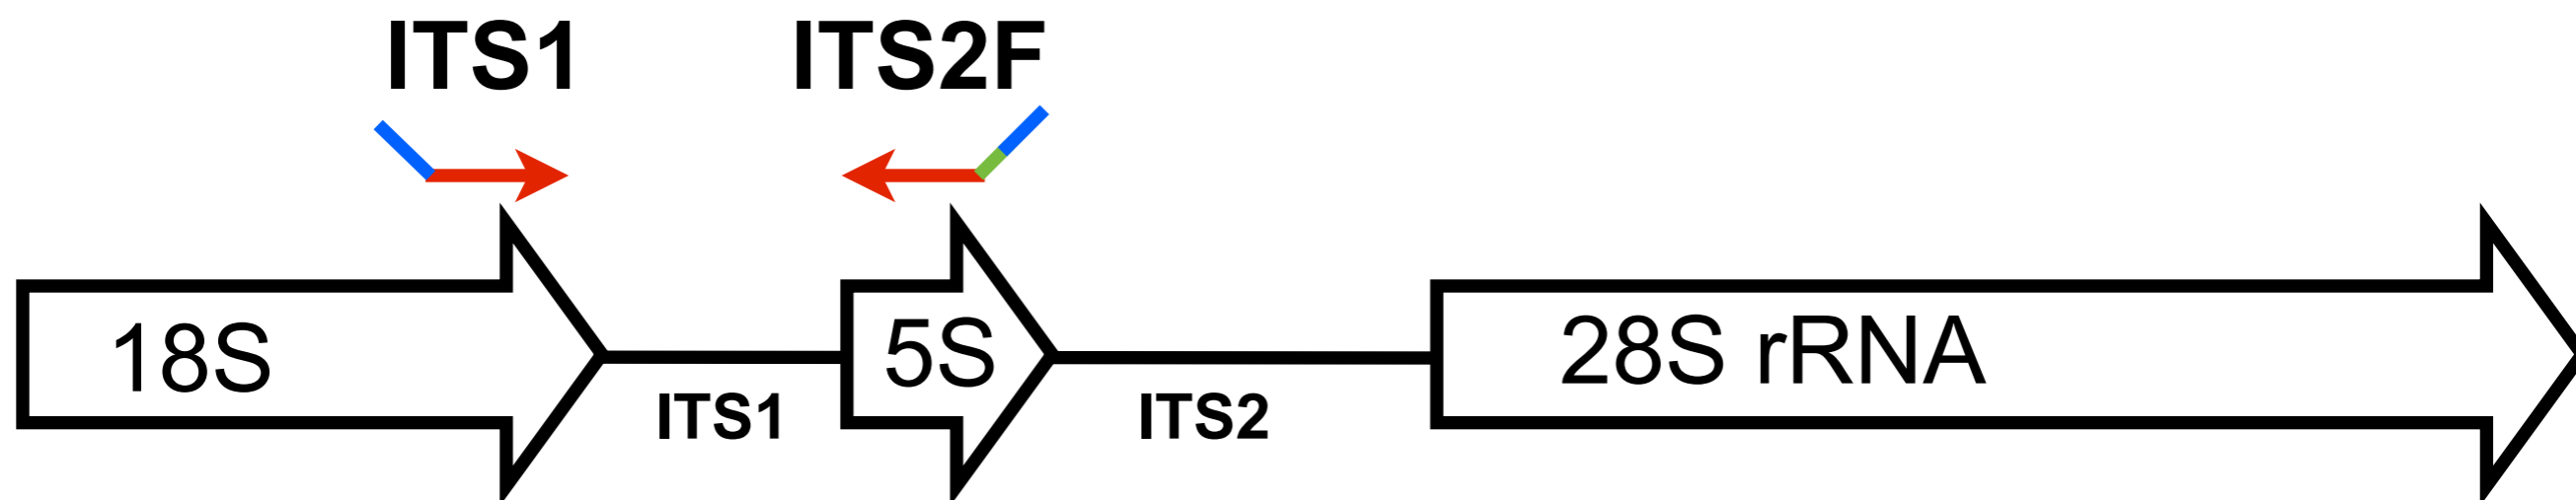

Supplement: 2049-2618-1-6-S1.pdf [file 2049-2618-1-6-S1.pdf]
